# Supplementary material
Source: HighWire-hosted journal article supplement (http://erj.ersjournals.com/highwire/filestream/113480/field_highwire_adjunct_files/0/Figure_supplementary_300dpi.pdf)

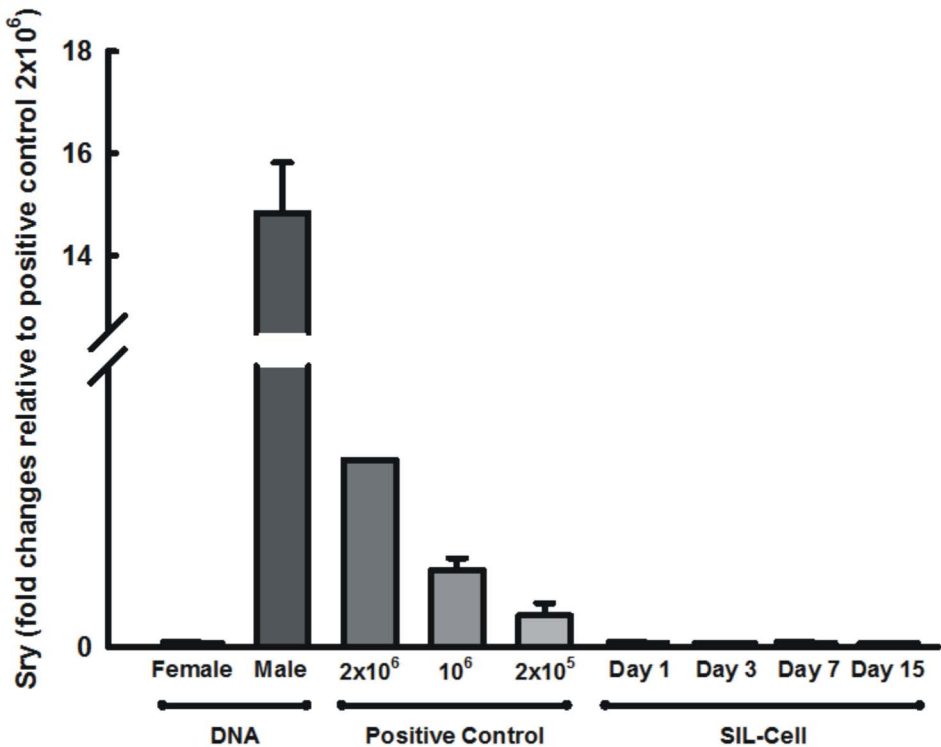

Supplement: Figure_supplementary_300dpi.pdf [file Figure_supplementary_300dpi.pdf]
